# Supplementary material for: Did we see it Coming? An Evaluation of the Swedish Early Awareness and Alert System
Source: PubMed Central journal article supplement — Appl Health Econ Health Policy. 2018 Oct 4;17(1):93–101. doi: 10.1007/s40258-018-0434-2 (PMC6346078; doi:10.1007/s40258-018-0434-2), 2018-10-04
Supplement: 40258_2018_434_MOESM1_ESM.pdf [file 40258_2018_434_MOESM1_ESM.pdf]

## Excluded EAA assessment reports

| Common name                                       | Therapeutic area                         | ATC     | Prioritization date* | Reason for exclusion <sup>#</sup> |
|---------------------------------------------------|------------------------------------------|---------|----------------------|-----------------------------------|
| rifaximin                                         | Hepatic encephalopathy                   | A07AA11 | 2012-08-24           | Not EMA                           |
| selexipag                                         | Hypertension, Pulmonary                  | B01AC27 | 2015-10-07           | After study period                |
| dabigatran etexilate                              | Atrial Fibrillation                      | B01AE07 | 2009-11-11           | Indication extension              |
| rivaroxaban                                       | Atrial Fibrillation                      | B01AF01 | 2012-03-13           | Indication extension              |
| rivaroxaban                                       | Deep Vein Thrombosis; Pulmonary Embolism | B01AF01 | 2012-04-18           | Indication extension              |
| rivaroxaban                                       | Acute Coronary Syndrome                  | B01AF01 | 2012-08-24           | Indication extension              |
| apixaban                                          | Atrial Fibrillation                      | B01AF02 | 2012-03-13           | Indication extension              |
| ivabradine                                        | Chronic Heart Failure                    | C01EB17 | 2012-01-31           | Indication extension              |
| tolvaptan                                         | Inappropriate ADH Syndrome               | C03XA01 | 2010-09-29           | Before study period               |
| tadalafil                                         | Benign Prostatic Hyperplasia             | G04BE08 | 2012-09-25           | Indication extension              |
| dutasteride                                       | Prostatic Neoplasms                      | G04CB02 | 2011-04-5            | Indication extension              |
| dasabuvir / ombitasvir / paritaprevir / ritonavir | Hepatitis C, Chronic                     | J05AP52 | 2014-11-12           | After study period <sup>s</sup>   |
| paclitaxel                                        | Pancreatic Neoplasms                     | L01CD01 | 2013-12-9            | Indication extension              |
| bevacizumab                                       | Ovarian Neoplasms                        | L01XC07 | 2011-11-2            | Indication extension              |
| ramucirumab                                       | Colorectal Neoplasms                     | L01XC21 | 2015-09-30           | Indication extension              |
| ramucirumab                                       | Carcinoma, Non-Small-Cell Lung           | L01XC21 | 2015-10-13           | Indication extension              |
| nivolumab                                         | Carcinoma, Non-Small-Cell Lung           | L01XC17 | 2015-06-25           | Indication extension              |
| necitumumab                                       | Carcinoma, Non-Small-Cell Lung           | L01XC22 | 2015-10-13           | After study period                |

|                     |                                        |         |            |                      |
|---------------------|----------------------------------------|---------|------------|----------------------|
| everolimus          | Breast Neoplasms                       | L01XE10 | 2012-10-18 | Indication extension |
| osimertinib         | Carcinoma, Non-Small-Cell Lung         | L01XE35 | 2015-12-16 | After study period   |
| abiraterone acetate | Prostatic Neoplasms                    | L02BX03 | 2013-01-16 | Indication extension |
| eculizumab          | Hemoglobinuria, Paroxysmal             | L04AA25 | 2010-12-22 | Before study period  |
| tofacitinib         | Arthritis, Rheumatoid                  | L04AA29 | 2012-10-22 | After study period   |
| daclizumab          | Multiple Sclerosis                     | L04AC01 | 2015-10-22 | After study period   |
| lesinurad           | Hyperuricemia                          | M04AB05 | 2015-12-02 | After study period   |
| tapentadol          | Pain                                   | N02AX06 | 2010-12-22 | Not EMA              |
| cannabinoids        | Multiple Sclerosis                     | N02BG10 | 2012-04-20 | Not EMA              |
| quetiapine          | Depressive Disorder, Major             | N05AH04 | 2010-07-12 | Indication extension |
| quetiapine          | Anxiety Disorders                      | N05AH04 | 2010-09-16 | Indication extension |
| indacaterol         | Pulmonary Disease, Chronic Obstructive | R03AC18 | 2010-05-12 | Before study period  |
| pegaptanib          | Macular Edema; Diabetes Complications  | S01LA03 | 2011-05-20 | Indication extension |
| ranibizumab         | Macular Edema; Diabetes Complications  | S01LA04 | 2010-10-27 | Indication extension |
| ranibizumab         | Central Retinal Vein Occlusion         | S01LA04 | 2011-09-06 | Indication extension |

ATC anatomical therapeutic chemical; EAA early awareness and assessment; EMA European Medicines Agency

\*Date of EAA assessment report

#'Before (after) study period' refers to when the medicine was processed by EMA

§Withdrawn by manufacturer
