# Supplementary material for: Did we see it Coming? An Evaluation of the Swedish Early Awareness and Alert System
Source: PubMed Central journal article supplement — Appl Health Econ Health Policy. 2018 Oct 4;17(1):93–101. doi: 10.1007/s40258-018-0434-2 (PMC6346078; doi:10.1007/s40258-018-0434-2), 2018-10-04
Supplement: 40258_2018_434_MOESM2_ESM.pdf [file 40258_2018_434_MOESM2_ESM.pdf]

### Sensitivity analysis: sales in the third year on the market

Tabulation by prioritization made by the EAA System and the economic impact

|                              |                 | Economic Impact |             |       |
|------------------------------|-----------------|-----------------|-------------|-------|
|                              |                 | >€4 million     | ≤€4 million | Total |
| EAA System<br>Prioritization | Prioritized     | 16              | 39          | 55    |
|                              | Not prioritized | 8               | 134         | 142   |
|                              | Total           | 24              | 173         | 197   |

EAA early awareness and alert

Measures of prioritization accuracy

| Statistic   |      | 95% CIs |      |
|-------------|------|---------|------|
|             |      |         |      |
| Sensitivity | 66.7 | 44.7    | 84.4 |
| Specificity | 77.5 | 70.5    | 83.5 |
| PPV         | 29.1 | 17.6    | 42.9 |
| NPV         | 94.4 | 89.2    | 97.5 |

CI confidence interval; PPV positive predictive value; NPV negative predictive value

### Sensitivity analysis: sales threshold of €2 million

Tabulation by prioritization made by the EAA System and the economic impact

|                              |                 | Economic Impact |             |       |
|------------------------------|-----------------|-----------------|-------------|-------|
|                              |                 | >€2 million     | ≤€2 million | Total |
| EAA System<br>Prioritization | Prioritized     | 22              | 49          | 71    |
|                              | Not prioritized | 12              | 170         | 182   |
|                              | Total           | 34              | 219         | 253   |

EAA early awareness and alert

Measures of prioritization accuracy

| Statistic   |      | 95% CIs |      |
|-------------|------|---------|------|
|             |      |         |      |
| Sensitivity | 64.7 | 46.5    | 80.3 |
| Specificity | 77.6 | 71.5    | 83.0 |
| PPV         | 31.0 | 20.5    | 43.1 |
| NPV         | 93.4 | 88.8    | 96.5 |

CI confidence interval; PPV positive predictive value; NPV negative predictive value

### Sensitivity analysis: sales threshold of €8 million

Tabulation by prioritization made by the EAA System and the economic impact

|                              |                 | Economic Impact |             |       |
|------------------------------|-----------------|-----------------|-------------|-------|
|                              |                 | >€8 million     | ≤€8 million | Total |
| EAA System<br>Prioritization | Prioritized     | 9               | 62          | 71    |
|                              | Not prioritized | 3               | 179         | 182   |
|                              | Total           | 12              | 241         | 253   |

EAA early awareness and alert

Measures of prioritization accuracy

| Statistic   |      | 95% CIs |      |
|-------------|------|---------|------|
|             |      |         |      |
| Sensitivity | 75.0 | 42.8    | 94.5 |
| Specificity | 74.3 | 68.3    | 79.7 |
| PPV         | 12.1 | 6.0     | 22.7 |
| NPV         | 98.4 | 95.3    | 99.7 |

CI confidence interval; PPV positive predictive value; NPV negative predictive value

### Subgroup analysis: new active substances

Tabulation by prioritization made by the EAA System and the economic impact

|                              |                 | Economic Impact |             |       |
|------------------------------|-----------------|-----------------|-------------|-------|
|                              |                 | >€4 million     | ≤€4 million | Total |
| EAA System<br>Prioritization | Prioritized     | 16              | 50          | 66    |
|                              | Not prioritized | 5               | 146         | 151   |
|                              | Total           | 21              | 196         | 217   |

EAA early awareness and alert

Measures of prioritization accuracy

| Statistic   |      | 95% CIs     |      |
|-------------|------|-------------|------|
|             |      | Sensitivity | 76.2 |
| Specificity | 74.3 | 67.8        | 80.4 |
| PPV         | 24.4 | 14.5        | 36.4 |
| NPV         | 96.7 | 92.4        | 98.9 |

CI confidence interval; PPV positive predictive value; NPV negative predictive value

### Subgroup analysis: orphan medicines

Tabulation by prioritization made by the EAA System and the economic impact

|                              |                 | Economic Impact |             |       |
|------------------------------|-----------------|-----------------|-------------|-------|
|                              |                 | >€4 million     | ≤€4 million | Total |
| EAA System<br>Prioritization | Prioritized     | 2               | 12          | 14    |
|                              | Not prioritized | 1               | 48          | 49    |
|                              | Total           | 3               | 60          | 63    |

EAA early awareness and alert

Measures of prioritization accuracy

| Statistic   |      | 95% CIs |      |
|-------------|------|---------|------|
|             |      |         |      |
| Sensitivity | 66.7 | 9.4     | 99.2 |
| Specificity | 80.0 | 67.7    | 89.2 |
| PPV         | 14.3 | 1.8     | 42.8 |
| NPV         | 98.0 | 89.1    | 99.9 |

CI confidence interval; PPV positive predictive value; NPV negative predictive value

### Subgroup analysis: antineoplastic and immunomodulating agents

Tabulation by prioritization made by the EAA System and the economic impact

|                              |                 | Economic Impact |             |       |
|------------------------------|-----------------|-----------------|-------------|-------|
|                              |                 | >€4 million     | ≤€4 million | Total |
| EAA System<br>Prioritization | Prioritized     | 12              | 24          | 36    |
|                              | Not prioritized | 0               | 38          | 38    |
|                              | Total           | 12              | 62          | 74    |

EAA early awareness and alert

Measures of prioritization accuracy

| Statistic   |       | 95% CIs |       |
|-------------|-------|---------|-------|
|             |       |         |       |
| Sensitivity | 100.0 | 73.5    | 100.0 |
| Specificity | 61.3  | 48.1    | 73.4  |
| PPV         | 33.3  | 18.6    | 51.0  |
| NPV         | 100.0 | 90.7    | 100.0 |

CI confidence interval; PPV positive predictive value; NPV negative predictive value
